# Supplementary material for: Disrupting Transcription and Folate Biosynthesis Leads to Synergistic Suppression of Escherichia coli Growth
Source: PubMed Central journal article supplement — ChemMedChem. 2022 Mar 15;17(10):e202200075. doi: 10.1002/cmdc.202200075 (PMC9314896; doi:10.1002/cmdc.202200075), 2022-03-15

# ChemMedChem

Supporting Information

## **Disrupting Transcription and Folate Biosynthesis Leads to Synergistic Suppression of *Escherichia coli* Growth**

Pei-Hsin Chen<sup>†</sup>, Li-Kang Sung<sup>†</sup>, Julian D. Hegemann, and John Chu<sup>\*</sup>

## Supplementary Information

|                                                                    |     |
|--------------------------------------------------------------------|-----|
| <b>Materials and Methods</b>                                       | S3  |
| Materials and consumables                                          |     |
| Strains, plasmid, and growth medium                                |     |
| MccJ25 production and purification                                 |     |
| MIC determination                                                  |     |
| Checkerboard assay                                                 |     |
| Time-kill assay                                                    |     |
| Resistance development assay                                       |     |
| <b>Table S1.</b> Strains and Plasmids                              | S6  |
| <b>Figure S1.</b> Raw data of <b>Figure 2</b>                      | S7  |
| <b>Figure S2.</b> Additional sulfonamide assays                    | S8  |
| <b>Figure S3.</b> GTP and dTMP supplementation results             | S9  |
| <b>Figure S4.</b> HPLC trace of purified MccJ25                    | S10 |
| <b>Figure S5.</b> High-resolution mass spectrometry data of MccJ25 | S11 |

## Materials and Methods:

**Materials and consumables.** Antibiotics were purchased from the following vendors: ChemScene (amikacin, ceftazidime, clarithromycin, D-cycloserine, fosfomycin, fusidic acid, minocycline, novobiocin, ofloxacin, polymyxin B, puromycin, sulfamonomethoxine, tobramycin, trimethoprim), Sigma-Aldrich (cerulenin), BioShop Canada (ampicillin, chloramphenicol, kanamycin, rifampicin), PanReac AppliChem (5-fluorouracil). Organic solvents and other chemicals were purchased from Sigma-Aldrich and Tokyo Chemical Industry. Consumables were purchased from Thermo Fisher Scientific and Bioman Scientific.

**Strains, plasmid, and growth medium.** Strains and plasmids used in this study are listed in **Table S1**. *Escherichia coli* MG1655 was provided by the Nai-Chun Lin laboratory at National Taiwan University. The pTUC202 plasmid was provided by Professor Mohamed A. Marahiel. Luria-Bertani (LB) broth was prepared from premixed powder purchased from BioShop Canada. All microbial strains were cultured in LB broth; cultures of *E. coli* carrying pTUC202 was supplemented with 25 µg/mL of chloramphenicol.

**MccJ25 production and purification.** MccJ25 was produced and purified based on published protocols with minor modifications. Briefly, *E. coli* BL21(DE3) carrying pTUC202 was cultivated in M9 medium supplemented with 0.4% (w/v) glucose and 2 mM MgSO<sub>4</sub> at 37 °C for 4 days. Cells were removed by centrifugation. The supernatant was heated in boiling water for 10 min and extracted with 2 volumes of 1-butanol. The organic layer was collected and dried *in vacuo*. The resulting residue was redissolved in a minimum amount of aqueous acetonitrile (5%, v/v) and loaded onto a solid-phase extraction cartridge (Sep-Pak C18 Vac, Waters) that had been pre-washed with acetonitrile and water, successively. Water and acetonitrile supplemented with 0.1% (v/v) formic acid were used as the mobile phase, denoted as solvent A and B, respectively. MccJ25 typically elutes at 25 to 35%B when the cartridge was washed with 5% (v/v) stepwise increments of solvent B. Fractions that contained MccJ25 were pooled and subjected to a second round of cartridge purification to yield materials for various antibiosis assays. A DMSO stock solution (16 mg/mL) was prepared from lyophilized MccJ25 powder and stored as aliquots at –20 °C. Quality assessment was performed by reversed-phase HPLC (Waters) with an analytical SHARPSIL-U C18 column (250 × 4.6 mm ID, 100 Å, 5 µm) (**Figure S3**). The identity of MccJ25

was confirmed by mass spectrometry (microTOF-QII, Bruker); HRMS (ESI-TOF) calculated for  $C_{101}H_{141}N_{23}O_{27} [M+2H]^{2+}$ : 1054.0178, found: 1054.0184 (**Figure S4**).

**MIC determination.** Susceptibility of *E. coli* MG1655 to individual antibiotics was performed in 96-well microtiter plates using the broth dilution method. First, LB medium was added to all wells (50  $\mu$ L). Antibiotic solutions in LB broth (50  $\mu$ L, 128  $\mu$ g/mL) were added to the first wells of each row and diluted serially (1/2 $\times$ ) across the plate. The last two wells were reserved for positive (no drug) and negative (no bacteria) controls. Overnight cultures in LB medium grown from a single-colony (200 rpm, 37  $^{\circ}$ C) were diluted 5,000-fold and added to each well (50  $\mu$ L). MIC values were determined by visual inspection after static incubation at 30  $^{\circ}$ C for 22 h. All assays were performed at least in triplicate.

**Checkerboard assay.** Serial dilutions of MccJ25 and a select antibiotic were prepared separately. They were then combined at equal volumes in a 96-well microtiter plate to generate a 12  $\times$  8 grid of two serially diluted antibiotics; the results were presented as a 6  $\times$  6 grid starting at the respective MIC of the two antibiotics. Overnight *E. coli* MG1655 cultures in LB medium grown from a single-colony (200 rpm, 37  $^{\circ}$ C) were diluted 5,000-fold and added to each well. The plate was incubated statically at 30  $^{\circ}$ C for 22 h and bacterial growth was quantified by optical density recorded at 600 nm ( $OD_{600}$ ). All assays were done at least in triplicate. The type of interaction between two antibiotics was categorized based on the minimum Fractional Inhibitory Concentration Index ( $FICI_m$ ),

$$FICI = \frac{A}{MIC_A} + \frac{B}{MIC_B}$$

where  $MIC_A$  and  $MIC_B$  denote the individual MIC of each antibiotic, and  $A$  and  $B$  denote their respective MIC in the presence of the other antibiotic. Antibiotic pairs with  $FICI_m < 0.5$  and  $FICI_m = 0.5$  are categorized as strongly and weakly synergistic, respectively. Those with  $0.5 < FICI_m \leq 4.0$  were categorized as indifferent to the presence of each other, and  $FICI \geq 4.0$  are antagonistic (not observed in our studies).

**Time-kill assay.** An overnight culture was grown from a single *E. coli* MG1655 colony in Müller-Hinton broth (MHB). The culture was used to start fresh MHB cultures at  $10^6$  CFU/mL supplemented with MccJ25 (1  $\mu$ g/mL), SMM (0.512 mg/mL), or both antibiotics (MccJ25 at 0.5

$\mu\text{g/mL}$  and SMM at 0.256 mg/mL). These cultures were incubated at 37 °C with agitation, serially diluted, and spotted on MHB agar plates after 0, 1, 2, 4, and 8 h. The plates were incubated at 37 °C until the formation of visible colonies. The number of colonies at each timepoint was counted and plotted into a time-kill trace. This assay was performed in triplicate.

**Resistance development assay.** An overnight culture was grown from a single *E. coli* MG1655 colony in MHB. Overnight cultures were washed with fresh MHB, serially diluted, and spotted on MHB agar plates supplemented with 1  $\mu\text{g/mL}$  MccJ25 and varying concentrations of SMM. The plates were incubated at 37 °C until the formation of visible colonies. The number of colonies at each timepoint was counted, and the number of CFU relative to that of the antibiotic-free control was used as a proxy for overall resistance development.

**Table S1.** Strains and Plasmids

| Designation                     | Relevant Characteristic                                                                                                 | Reference                              |
|---------------------------------|-------------------------------------------------------------------------------------------------------------------------|----------------------------------------|
| <i>Escherichia coli</i> Strains |                                                                                                                         |                                        |
| K12 MG1655                      | F <sup>-</sup> , λ <sup>-</sup> , ilvG <sup>-</sup> , <i>rfb-50</i> , <i>rph-1</i>                                      | N. C., Lin, National Taiwan University |
| BL21(DE3)                       | <i>E. coli</i> B, F <sup>-</sup> , <i>dcm</i> , <i>ompT</i> , <i>hsdS</i> (rB <sup>-</sup> mB <sup>-</sup> ), gal (DE3) | RBCBioscience, Taiwan                  |
| Plasmids                        |                                                                                                                         |                                        |
| pTUC202                         | MccJ25 producing plasmids, Cm <sup>R</sup>                                                                              | [1]                                    |

[1] J. O. Solbiati, M. Ciaccio, R. N. Farias, R. A. Salomon, Genetic analysis of plasmid determinants for microcin J25 production and immunity. *J. Bacteriol.* **1996**, *178*, 3661-3663.

**Figure S1. Raw data of Figure 2**

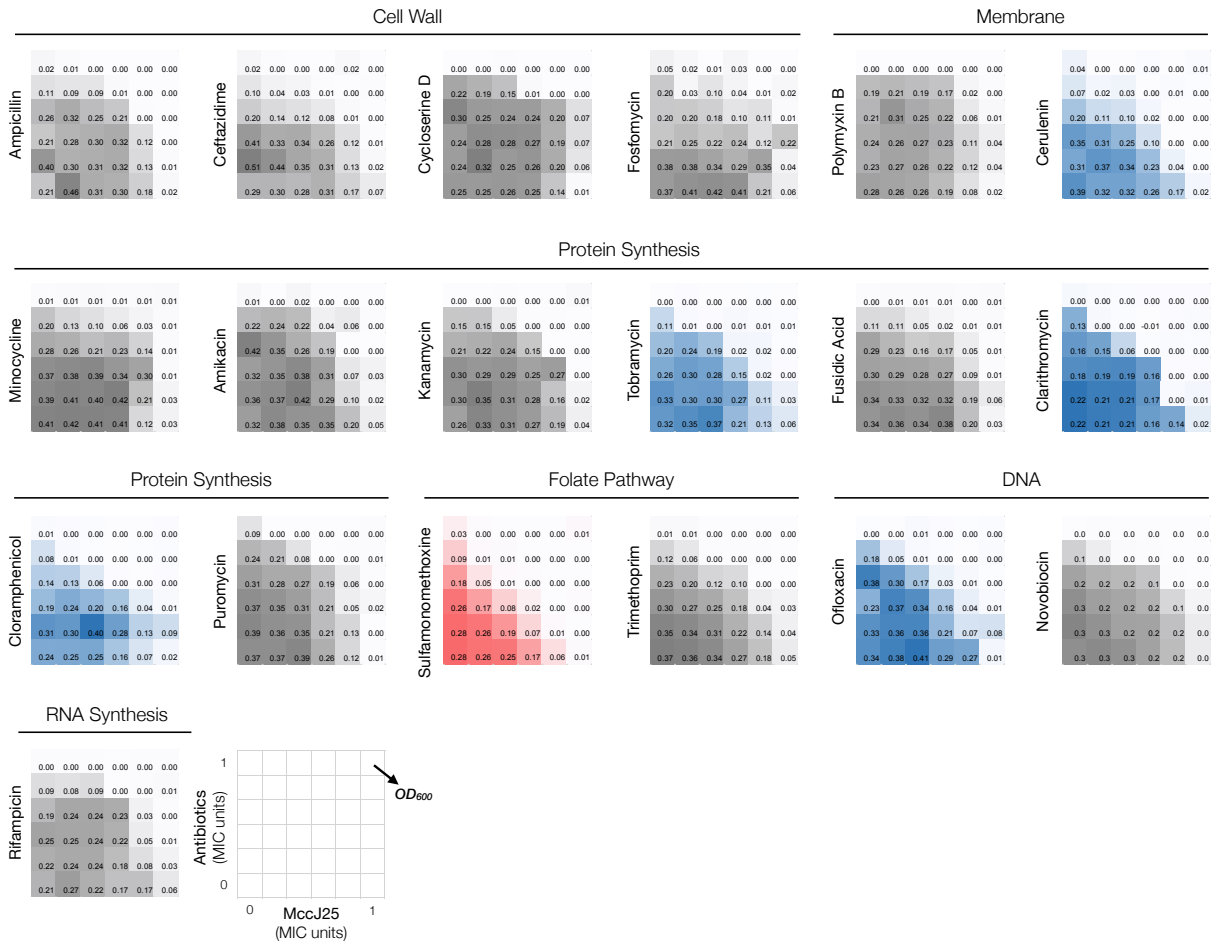

**Figure S2.** Additional sulfonamide antibacterial agents were tested. Both sulfamethoxazole and sulfadiazine show moderate synergy with MccJ25 (FICI = 0.5) against *E. coli* MG1655. MIC for sulfamethoxazole: 128  $\mu\text{g}/\text{mL}$ ; sulfadiazine: 128  $\mu\text{g}/\text{mL}$ .

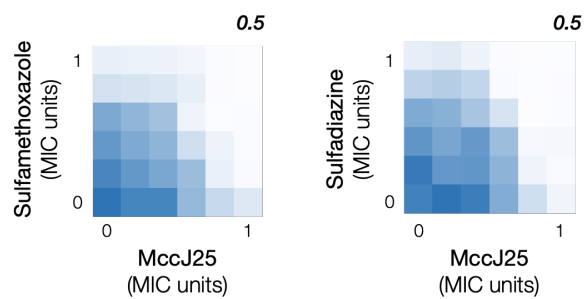



**Figure S3.** GTP and dTMP supplementation results. **a.** The addition of GTP (2 mM) in the growth medium did not lead to an apparent change in MccJ25-SMM synergy. **b.** The addition of dTMP (50  $\mu$ M) in the growth medium results in no synergy between MccJ25 and SMM.

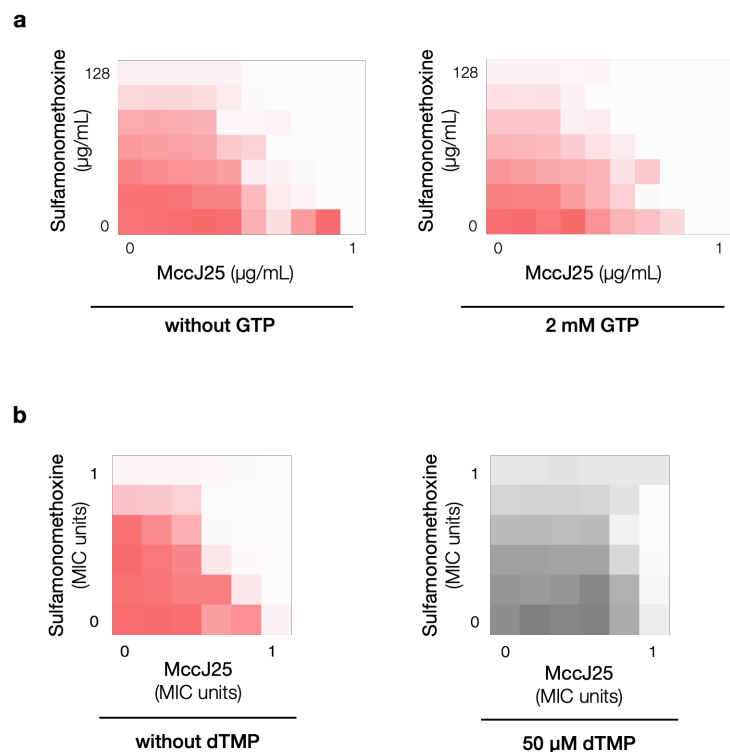

**Figure S4.** HPLC trace of purified MccJ25

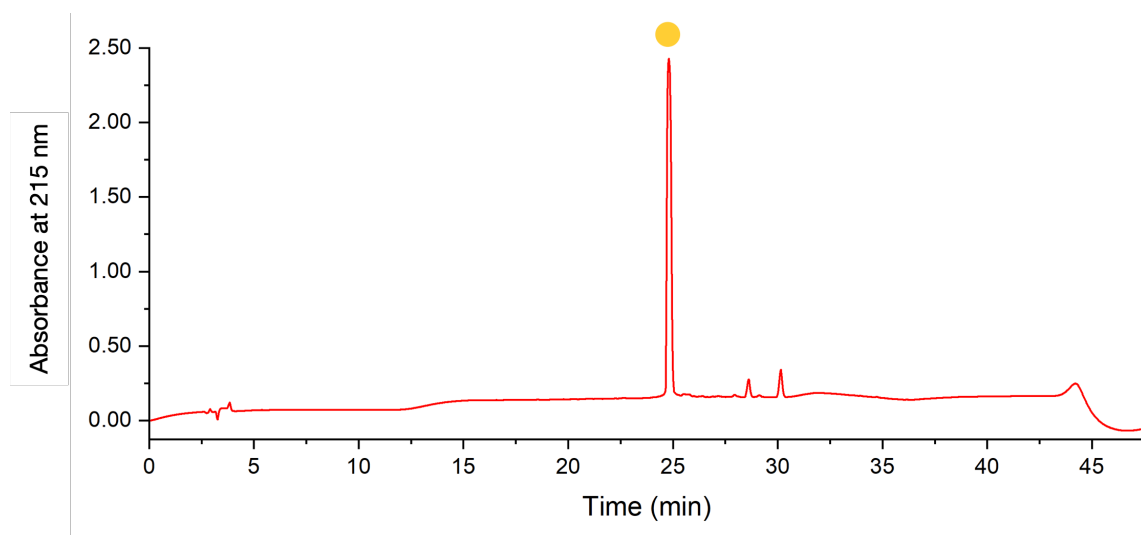

**Figure S5.** High-resolution mass spectrometry data of MccJ25

| Meas. m/z | # | Ion Formula    | m/z       | err [mDa] | err [ppm] | mSigma | Score  | rdb  | e <sup>-</sup> Conf | N-Rule |
|-----------|---|----------------|-----------|-----------|-----------|--------|--------|------|---------------------|--------|
| 1054.0184 | 1 | C101H141N23O27 | 1054.0178 | 0.6       | 0.5       | 21.3   | 100.00 | 43.0 | even                | ok     |

**+MS, 0.1-0.3min #6-15**

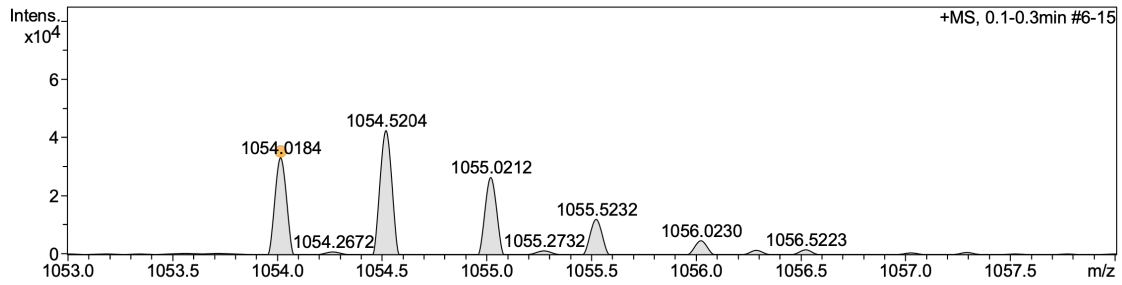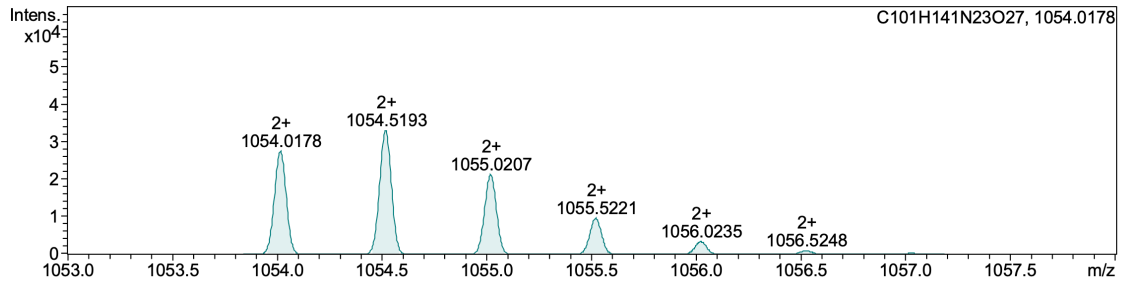

Supplement: CMDC-17-0-s001.pdf [file CMDC-17-0-s001.pdf]
